# Supplementary material for: Clinical and Disease Characteristics From REVEAL at Time of Enrollment (Baseline): Prospective Observational Study of Patients With Polycythemia Vera in the United States
Source: PubMed Central journal article supplement — Clin Lymphoma Myeloma Leuk. Author manuscript; Available in PMC 2021 May 25. (PMC8148982; doi:10.1016/j.clml.2018.08.009), 2018-08-29
Supplement: NIHMS1698061-supplement-1.pdf [file NIHMS1698061-supplement-1.pdf]

## REVEAL Preliminary Report

**Supplemental Table 1** Education, Employment, Insurance, and Residency Characteristics at Enrollment for 2510 Patients

| Characteristic                               | N (%)       |
|----------------------------------------------|-------------|
| <b>Highest Level of Education</b>            |             |
| Less than high school                        | 114 (4.5)   |
| High school graduate/equivalent              | 805 (32.1)  |
| Some college                                 | 556 (22.2)  |
| College degree                               | 686 (27.3)  |
| Graduate degree                              | 332 (13.2)  |
| Missing                                      | 17 (0.7)    |
| <b>Current Employment Status<sup>a</sup></b> |             |
| Full-time employee                           | 721 (28.7)  |
| Part-time employee                           | 119 (4.7)   |
| Homemaker                                    | 89 (3.5)    |
| Student                                      | 7 (0.3)     |
| Retired                                      | 1282 (51.1) |
| Unable to work/disabled                      | 110 (4.4)   |
| Other                                        | 73 (2.9)    |
| Unknown                                      | 107 (4.3)   |
| Missing                                      | 2 (0.1)     |
| <b>Health Insurance<sup>b</sup></b>          |             |
| Medicare                                     | 1350 (53.8) |
| Preferred provider organization              | 629 (25.1)  |
| Health maintenance organization              | 289 (11.5)  |
| Medicaid                                     | 109 (4.3)   |
| TRICARE                                      | 73 (2.9)    |
| Self-insured                                 | 32 (1.3)    |
| Veterans Affairs/Department of Defense       | 24 (1.0)    |
| Other <sup>c</sup>                           | 353 (14.1)  |
| None                                         | 16 (0.6)    |
| <b>Patient Residency Setting</b>             |             |
| At home, living independently                | 2381 (94.9) |
| At home, living as dependent                 | 93 (3.7)    |
| Assisted living                              | 20 (0.8)    |
| Long-term care facility                      | 3 (0.1)     |
| Other                                        | 9 (0.4)     |
| Missing                                      | 4 (0.2)     |

<sup>a</sup>First choice as listed in sequence of electronic data captured.

<sup>b</sup>Patients may have been included in more than one health insurance category.

<sup>c</sup>Includes range of health insurance and prescription plans and may include some that are reported within other categories.

**Supplemental Table 2** Most Common Comorbid Conditions in 2510 Patients

| Condition                                               | N (%)       |
|---------------------------------------------------------|-------------|
| <b>Select Cardiovascular Disease–Related Conditions</b> |             |
| Hypertension                                            | 1772 (70.6) |
| Hyperlipidemia                                          | 763 (30.4)  |
| Obesity <sup>a</sup>                                    | 440 (17.5)  |
| Diabetes mellitus                                       | 395 (15.7)  |
| <b>History of Cancer in ≥ 1% of Patients</b>            |             |
| Skin                                                    | 88 (3.5)    |
| Nonmelanoma skin cancer                                 | 83 (3.3)    |
| Prostate                                                | 73 (2.9)    |
| Breast                                                  | 48 (1.9)    |
| Malignant melanoma                                      | 27 (1.1)    |
| Colon                                                   | 25 (1.0)    |

<sup>a</sup>Per discretion of managing physician.
